# Supplementary material
Source: ML conference proceedings conference paper supplement (https://aclanthology.org/D18-1076)
Supplement: Attachment [file dialog-movie-dataset-appendix.pdf › dialog-movie-dataset-appendix.pdf]

# 1 Appendix

## 1.1 Movie lists

- Batman Begins
- Bruce Almighty
- Batman v Superman: Dawn of Justice
- Catch me if you can
- Despicable me (2010)
- Dunkirk
- Frozen (2013)
- Home Alone
- How to Train Your Dragon (2010)
- The Imitation Game
- Iron Man (2008)
- Jaws
- John Wick (2014)
- La La Land
- Maleficent
- Mean Girls
- Monsters University
- Real Steel
- The Avengers (2012)
- The Blind Side
- The Great Gatsby (2013)
- The Inception
- The Notebook
- The Post
- The Shape of Water
- The Social Network
- The Wolf of Wall Street
- Toy Story
- Wonder Woman
- Zootopia

## 1.2 Instructions given to the workers

### 1.2.1 Scenario 1: users with document

- The user you are pairing does not have the document you hold. Please read the document first.
- Tell the other user what the movie is, and try to persuade the other user to watch/not to watch the movie using the information in the document.
- You should try to discuss the new paragraph when the document has changed.
- You will have 3 turns of conversation with your partner on each of the documents.
- You will be given 4 documents each containing a short paragraph. The new paragraph might show just beneath the previous document.
- The next document will be loaded automatically after you finish 3 turns discussing the current document.
- You cannot use information you personally know that is not included there. You can use any information given in the document in the conversation.

### 1.2.2 Scenario 1: users without document

- The other user will read a document about a movie.
- If you are not told the name of the movie, try to ask the movie name.
- After you are told the name of the movie, pretend you are interested in watching the movie, and try to gather all the information you need to make a decision whether to watch the movie in the end.
- You don't have to tell the other user your decision in the end, but please share your mind at the feedback page.

### 1.2.3 Scenario 2: both users with document

- The user you pair with has the same set of documents as yours. Please read the document first

- Imagine you just watched this movie. Discuss the content in the document with the other user, and show whether you like/dislike the movie.
- You should try to discuss the new paragraph when the document has changed.
- You will have 3 turns of conversation with your partner on each of the documents.
- You will be given 4 documents each containing a short paragraph. The new paragraph might show just beneath the previous document
- The next document will be loaded automatically after you finish 3 turns discussing the current document.
- You cannot use information you personally know that is not included there. You can use any information given in the document in the conversation.

### **1.3 Post conversation survey questions**

#### **1.3.1 For users with document**

Choose any:

- The document is understandable.
- The other user is actively responding to me.
- The conversation goes smoothly.

Choose one of the following:

- I have watched the movie before.
- I have not watched the movie before.

#### **1.3.2 For users without document**

Choose any:

- The document is understandable.
- The other user is actively responding to me.
- The conversation goes smoothly.

Choose one of the following:

- I will watch the movie after the other user's introduction.
- I will not watch the movie after the other user's introduction.

### **1.4 Conversation Example 1**

| Section 1                |                                                                                                                                                                                                                                                                                                                                                                                                                                                                                                                                                                                                                                                                                                                                                                                                 |
|--------------------------|-------------------------------------------------------------------------------------------------------------------------------------------------------------------------------------------------------------------------------------------------------------------------------------------------------------------------------------------------------------------------------------------------------------------------------------------------------------------------------------------------------------------------------------------------------------------------------------------------------------------------------------------------------------------------------------------------------------------------------------------------------------------------------------------------|
| <b>Name</b>              | The inception                                                                                                                                                                                                                                                                                                                                                                                                                                                                                                                                                                                                                                                                                                                                                                                   |
| <b>Year</b>              | 2009                                                                                                                                                                                                                                                                                                                                                                                                                                                                                                                                                                                                                                                                                                                                                                                            |
| <b>Director</b>          | Christopher Nolan                                                                                                                                                                                                                                                                                                                                                                                                                                                                                                                                                                                                                                                                                                                                                                               |
| <b>Genre</b>             | scientific                                                                                                                                                                                                                                                                                                                                                                                                                                                                                                                                                                                                                                                                                                                                                                                      |
| <b>Cast</b>              | Leonardo DiCaprio as Dom Cobb, a professional thief who specializes in conning secrets from his victims by infiltrating their dreams.<br>Joseph Gordon-Levitt as Arthur, Cobb's partner who manages and researches the missions.<br>Ellen Page as Ariadne, a graduate student of architecture who is recruited to construct the various dreamscapes, which are described as mazes.<br>Tom Hardy as Eames, a sharp-tongued associate of Cobb.                                                                                                                                                                                                                                                                                                                                                    |
| <b>Critical Response</b> | wildly ingenious chess game, the result is a knockout.<br>DiCaprio, who has never been better as the tortured hero, draws you in with a love story that will appeal even to non-sci-fi fans.<br>I found myself wishing Inception were weirder, further out the film is Nolan's labyrinth all the way, and it's gratifying to experience a summer movie with large visual ambitions and with nothing more or less on its mind than (as Shakespeare said) a dream that hath no bottom.<br>Have no idea what so many people are raving about. It's as if someone went into their heads while they were sleeping and planted the idea that Inception is a visionary masterpiece and hold on Whoa! I think I get it. The movie is a metaphor for the power of delusional hype a metaphor for itself. |
| <b>Introduction</b>      | Dominick Cobb and Arthur are extractors, who perform corporate espionage using an experimental military technology to infiltrate the subconscious of their targets and extract valuable information through a shared dream world. Their latest target, Japanese businessman Saito, reveals that he arranged their mission himself to test Cobb for a seemingly impossible job: planting an idea in a person's subconscious, or inception. To break up the energy conglomerate of ailing competitor Maurice Fischer, Saito wants Cobb to convince Fischer's son and heir, Robert, to dissolve his father's company.                                                                                                                                                                              |
| <b>Rating</b>            | Rotten Tomatoes: 86% and average: 8.1/10; IMDB: 8.8/10                                                                                                                                                                                                                                                                                                                                                                                                                                                                                                                                                                                                                                                                                                                                          |
| Conversation             |                                                                                                                                                                                                                                                                                                                                                                                                                                                                                                                                                                                                                                                                                                                                                                                                 |
| user2:                   | Hey have you seen the inception?                                                                                                                                                                                                                                                                                                                                                                                                                                                                                                                                                                                                                                                                                                                                                                |
| user1:                   | No, I have not but have heard of it. What is it about                                                                                                                                                                                                                                                                                                                                                                                                                                                                                                                                                                                                                                                                                                                                           |
| user2:                   | It's about extractors that perform experiments using military technology on people to retrieve info about their targets.                                                                                                                                                                                                                                                                                                                                                                                                                                                                                                                                                                                                                                                                        |
| user1:                   | Sounds interesting do you know which actors are in it?                                                                                                                                                                                                                                                                                                                                                                                                                                                                                                                                                                                                                                                                                                                                          |
| user2:                   | I haven't watched it either or seen a preview. But it's sci-fi so it might be good. Ugh Leonardo DiCaprio is the main character                                                                                                                                                                                                                                                                                                                                                                                                                                                                                                                                                                                                                                                                 |
| user2:                   | He plays as Don Cobb                                                                                                                                                                                                                                                                                                                                                                                                                                                                                                                                                                                                                                                                                                                                                                            |
| user1:                   | Oh okay, yeah I'm not a big sci-fi fan but there are a few movies I still enjoy in that genre.                                                                                                                                                                                                                                                                                                                                                                                                                                                                                                                                                                                                                                                                                                  |
| user1:                   | Is it a long movie?                                                                                                                                                                                                                                                                                                                                                                                                                                                                                                                                                                                                                                                                                                                                                                             |
| user2:                   | Doesn't say how long it is.                                                                                                                                                                                                                                                                                                                                                                                                                                                                                                                                                                                                                                                                                                                                                                     |
| user2:                   | The Rotten Tomatoes score is 86%                                                                                                                                                                                                                                                                                                                                                                                                                                                                                                                                                                                                                                                                                                                                                                |

Table 1: Utterances that corresponds to section 1 of the document in the example conversation 1.

| Section 2      |                                                                                                                                                                                                                                                                                                                                                                                                                                                                                                                                                                                                                                                                                                                                                                                                                                                                                                                                                                                                                                                                                                                                                                                                                                                                                                                                                 |
|----------------|-------------------------------------------------------------------------------------------------------------------------------------------------------------------------------------------------------------------------------------------------------------------------------------------------------------------------------------------------------------------------------------------------------------------------------------------------------------------------------------------------------------------------------------------------------------------------------------------------------------------------------------------------------------------------------------------------------------------------------------------------------------------------------------------------------------------------------------------------------------------------------------------------------------------------------------------------------------------------------------------------------------------------------------------------------------------------------------------------------------------------------------------------------------------------------------------------------------------------------------------------------------------------------------------------------------------------------------------------|
| <b>Scene 1</b> | When the elder Fischer dies in Sydney, Robert Fischer accompanies the body on a ten-hour flight back to Los Angeles, which the team (including Saito, who wants to verify their success) uses as an opportunity to sedate and take Fischer into a shared dream. At each dream level, the person generating the dream stays behind to set up a 'kick' that will be used to awaken the other sleeping team members from the deeper dream level; to be successful, these kicks must occur simultaneously at each dream level, a fact complicated due to the nature of time which flows much faster in each successive level. The first level is Yusuf's dream of a rainy Los Angeles. The team abducts Fischer, but they are attacked by armed projections from Fischer's subconscious, which has been specifically trained to defend him against such intruders. The team takes Fischer and a wounded Saito to a warehouse, where Cobb reveals that while dying in the dream would normally wake Saito up, the powerful sedatives needed to stabilize the multi-level dream will instead send a dying dreamer into 'limbo', a world of infinite subconscious from which escape is extremely difficult, if not almost impossible, and a dreamer risks forgetting they are in a dream. Despite these setbacks, the team continues with the mission. |
| Conversation   |                                                                                                                                                                                                                                                                                                                                                                                                                                                                                                                                                                                                                                                                                                                                                                                                                                                                                                                                                                                                                                                                                                                                                                                                                                                                                                                                                 |
| user1:         | Wow, that's impressive. I like to look at Rotten Tomatoes when debating whether or not to see a movie. Do you know the director?                                                                                                                                                                                                                                                                                                                                                                                                                                                                                                                                                                                                                                                                                                                                                                                                                                                                                                                                                                                                                                                                                                                                                                                                                |
| user2:         | Something about Dom Cobb infiltrates peoples dreams in a dream world.                                                                                                                                                                                                                                                                                                                                                                                                                                                                                                                                                                                                                                                                                                                                                                                                                                                                                                                                                                                                                                                                                                                                                                                                                                                                           |
| user2:         | The director is Christopher nolan                                                                                                                                                                                                                                                                                                                                                                                                                                                                                                                                                                                                                                                                                                                                                                                                                                                                                                                                                                                                                                                                                                                                                                                                                                                                                                               |
| user2:         | Heard of him?                                                                                                                                                                                                                                                                                                                                                                                                                                                                                                                                                                                                                                                                                                                                                                                                                                                                                                                                                                                                                                                                                                                                                                                                                                                                                                                                   |
| user2:         | Wow I thought this was recent but it came out in 2009.                                                                                                                                                                                                                                                                                                                                                                                                                                                                                                                                                                                                                                                                                                                                                                                                                                                                                                                                                                                                                                                                                                                                                                                                                                                                                          |
| user1:         | He directed The Dark Knight which I enjoy. Yeah, I know it's been out awhile but 2009 does seem to be a while back now. Time flies.                                                                                                                                                                                                                                                                                                                                                                                                                                                                                                                                                                                                                                                                                                                                                                                                                                                                                                                                                                                                                                                                                                                                                                                                             |
| user1:         | Do you know if it won any awards?                                                                                                                                                                                                                                                                                                                                                                                                                                                                                                                                                                                                                                                                                                                                                                                                                                                                                                                                                                                                                                                                                                                                                                                                                                                                                                               |
| user1:         | or how much it made at the box office?                                                                                                                                                                                                                                                                                                                                                                                                                                                                                                                                                                                                                                                                                                                                                                                                                                                                                                                                                                                                                                                                                                                                                                                                                                                                                                          |
| user2:         | Oh wow I loved the dark night movies. And it doesn't say if it's won awards or how much at box office.                                                                                                                                                                                                                                                                                                                                                                                                                                                                                                                                                                                                                                                                                                                                                                                                                                                                                                                                                                                                                                                                                                                                                                                                                                          |
| user2:         | A critic did say it could be "weirder"                                                                                                                                                                                                                                                                                                                                                                                                                                                                                                                                                                                                                                                                                                                                                                                                                                                                                                                                                                                                                                                                                                                                                                                                                                                                                                          |

Table 2: Utterances that corresponds to section 2 of the document in the example conversation 1.

| Section 3      |                                                                                                                                                                                                                                                                                                                                                                                                                                                                                                                                                                                                                                                                                                                                                                        |
|----------------|------------------------------------------------------------------------------------------------------------------------------------------------------------------------------------------------------------------------------------------------------------------------------------------------------------------------------------------------------------------------------------------------------------------------------------------------------------------------------------------------------------------------------------------------------------------------------------------------------------------------------------------------------------------------------------------------------------------------------------------------------------------------|
| <b>Scene 2</b> | Cobb reveals to Ariadne that he and Mal went to Limbo while experimenting with the dream-sharing technology. Sedated for a few hours of real time, they spent fifty years in a dream constructing a world from their shared memories. When Mal refused to return to reality, Cobb used a rudimentary form of inception by reactivating her totem (an object dreamers use to distinguish dreams from reality) and reminding her subconscious that their world was not real. However, when she woke up, Mal still believed that she was dreaming. In an attempt to 'wake up' for real, Mal committed suicide and framed Cobb for her death to force him to do the same. Facing a murder charge, Cobb fled the U.S., leaving his children in the care of Professor Miles. |
| Conversation   |                                                                                                                                                                                                                                                                                                                                                                                                                                                                                                                                                                                                                                                                                                                                                                        |
| user1:         | The concept seems interesting and it has a good lead actor as well as director and reviews. I think it must be good. The plot does seem weird, that's for sure.                                                                                                                                                                                                                                                                                                                                                                                                                                                                                                                                                                                                        |
| user2:         | Tom Hardy is in the movie as the character Earnes. And yeah the plot is a bit strange.                                                                                                                                                                                                                                                                                                                                                                                                                                                                                                                                                                                                                                                                                 |
| user2:         | I might watch this movie now.                                                                                                                                                                                                                                                                                                                                                                                                                                                                                                                                                                                                                                                                                                                                          |
| user1:         | I think I may as well. I can't say I've heard of Tom Hardy however. Is there any other supporting actors?                                                                                                                                                                                                                                                                                                                                                                                                                                                                                                                                                                                                                                                              |
| user2:         | Oh Earnes is a sharp tongue associate of Cobb.                                                                                                                                                                                                                                                                                                                                                                                                                                                                                                                                                                                                                                                                                                                         |
| user2:         | Ellen Page                                                                                                                                                                                                                                                                                                                                                                                                                                                                                                                                                                                                                                                                                                                                                             |
| user1:         | Oh, cool. I am familiar with her. She's in a number of good movies and is great.                                                                                                                                                                                                                                                                                                                                                                                                                                                                                                                                                                                                                                                                                       |
| user2:         | She plays Ariadne , she is a graduate student that constructs the dreamscapes, they're like mazes.                                                                                                                                                                                                                                                                                                                                                                                                                                                                                                                                                                                                                                                                     |

Table 3: Utterances that corresponds to section 3 of the document in the example conversation 1.

| Section 4      |                                                                                                                                                                                                                                                                                                                                                                                                                                                                                                                                                                                                                                                                                                                                                                                                                                                                                                                                                                         |
|----------------|-------------------------------------------------------------------------------------------------------------------------------------------------------------------------------------------------------------------------------------------------------------------------------------------------------------------------------------------------------------------------------------------------------------------------------------------------------------------------------------------------------------------------------------------------------------------------------------------------------------------------------------------------------------------------------------------------------------------------------------------------------------------------------------------------------------------------------------------------------------------------------------------------------------------------------------------------------------------------|
| <b>Scene 3</b> | Through his confession, Cobb makes peace with his guilt over Mal's death. Ariadne kills Mal's projection and wakes Fischer up with a kick. Revived at the mountain hospital, Fischer enters a safe room to discover and accept the planted idea: a projection of his dying father telling him to be his own man. While Cobb remains in Limbo to search for Saito, the other team members ride the synchronized kicks back to reality. Cobb eventually finds an aged Saito in Limbo and reminds him of their agreement. The dreamers all awake on the plane and Saito makes a phone call. Upon arrival at Los Angeles Airport, Cobb passes the U.S. immigration checkpoint and Professor Miles accompanies him to his home. Using his totem a spinning top that spins indefinitely in a dream world but falls over in reality Cobb conducts a test to prove that he is indeed in the real world, but he ignores its result and instead joins his children in the garden. |
| Conversation   |                                                                                                                                                                                                                                                                                                                                                                                                                                                                                                                                                                                                                                                                                                                                                                                                                                                                                                                                                                         |
| user1:         | Hmm interesting. Do you know if it's an action movie or mostly just scifi?                                                                                                                                                                                                                                                                                                                                                                                                                                                                                                                                                                                                                                                                                                                                                                                                                                                                                              |
| user2:         | Says scientific                                                                                                                                                                                                                                                                                                                                                                                                                                                                                                                                                                                                                                                                                                                                                                                                                                                                                                                                                         |
| user1:         | Certainly seems unique. Do you know if it is based off a book or a previous work?                                                                                                                                                                                                                                                                                                                                                                                                                                                                                                                                                                                                                                                                                                                                                                                                                                                                                       |
| user2:         | Something about at the end he has trouble determining which is reality and which is a dream. It doesn't say it's based off anything.                                                                                                                                                                                                                                                                                                                                                                                                                                                                                                                                                                                                                                                                                                                                                                                                                                    |
| user1:         | Sounds like it might be suspense/thriller as well as scifi which is cool. It seems pretty confusing but enticing. Makes me want to see it to try and figure it all out.                                                                                                                                                                                                                                                                                                                                                                                                                                                                                                                                                                                                                                                                                                                                                                                                 |
| user2:         | Yeah its like its got a bit of mystery too. Trying to figure out what's real and what's not.                                                                                                                                                                                                                                                                                                                                                                                                                                                                                                                                                                                                                                                                                                                                                                                                                                                                            |
| user1:         | I can't think of any other movie or even book that has a related story either which makes it very interesting. A very original concept.                                                                                                                                                                                                                                                                                                                                                                                                                                                                                                                                                                                                                                                                                                                                                                                                                                 |
| user2:         | Yeah well have great day. :)                                                                                                                                                                                                                                                                                                                                                                                                                                                                                                                                                                                                                                                                                                                                                                                                                                                                                                                                            |

Table 4: Utterances that corresponds to section 4 of the document in the example conversation 1.

## 1.5 Conversation Example 2

| Section 1                |                                                                                                                                                                                                                                                                                                                                                                                                                                                                                                                                                                                                                                                     |
|--------------------------|-----------------------------------------------------------------------------------------------------------------------------------------------------------------------------------------------------------------------------------------------------------------------------------------------------------------------------------------------------------------------------------------------------------------------------------------------------------------------------------------------------------------------------------------------------------------------------------------------------------------------------------------------------|
| <b>Name</b>              | The Shape of Water                                                                                                                                                                                                                                                                                                                                                                                                                                                                                                                                                                                                                                  |
| <b>Year</b>              | 2017                                                                                                                                                                                                                                                                                                                                                                                                                                                                                                                                                                                                                                                |
| <b>Director</b>          | Guillermo del Toro                                                                                                                                                                                                                                                                                                                                                                                                                                                                                                                                                                                                                                  |
| <b>Genre</b>             | Fantasy, Drama                                                                                                                                                                                                                                                                                                                                                                                                                                                                                                                                                                                                                                      |
| <b>Cast</b>              | Sally Hawkins as Elisa Esposito, a mute cleaner who works at a secret government laboratory.<br>Michael Shannon as Colonel Richard Strickland, a corrupt military official,<br>Richard Jenkins as Giles, Elisa's closeted neighbor and close friend who is a struggling advertising illustrator.<br>Octavia Spencer as Zelda Delilah Fuller, Elisa's co-worker and friend who serves as her interpreter.,<br>Michael Stuhlbarg as Dimitri Mosenkov, a Soviet spy working as a scientist studying the creature, under the alias Dr. Robert Hoffstetler.                                                                                              |
| <b>Critical Response</b> | one of del Toro's most stunningly successful works, also a powerful vision of a creative master feeling totally, joyously free.<br>Even as the film plunges into torment and tragedy, the core relationship between these two unlikely lovers holds us in thrall. Del Toro is a world-class film artist.<br>There's no sense trying to analyze how he does it.<br>The Shape of Water has tenderness uncommon to del Toro films.<br>While The Shape of Water isn't groundbreaking, it is elegant and mesmerizing.<br>refer Sally Hawkins' mute character as 'mentally handicapped' and for erroneously crediting actor Benicio del Toro as director. |
| <b>Introduction</b>      | The Shape of Water is a 2017 American fantasy drama film directed by Guillermo del Toro and written by del Toro and Vanessa Taylor. It stars Sally Hawkins, Michael Shannon, Richard Jenkins, Doug Jones, Michael Stuhlbarg, and Octavia Spencer. Set in Baltimore in 1962, the story follows a mute custodian at a high-security government laboratory who falls in love with a captured humanoid amphibian creature.                                                                                                                                                                                                                              |
| <b>Rating</b>            | Rotten Tomatoes: 92% and average: 8.4/10<br>Metacritic Score: 87/100<br>CinemaScore: A                                                                                                                                                                                                                                                                                                                                                                                                                                                                                                                                                              |
| Conversation             |                                                                                                                                                                                                                                                                                                                                                                                                                                                                                                                                                                                                                                                     |
| user1:                   | Hi                                                                                                                                                                                                                                                                                                                                                                                                                                                                                                                                                                                                                                                  |
| user2:                   | Hi                                                                                                                                                                                                                                                                                                                                                                                                                                                                                                                                                                                                                                                  |
| user2:                   | I thought The Shape of Water was one of Del Toro's best works. What about you?                                                                                                                                                                                                                                                                                                                                                                                                                                                                                                                                                                      |
| user1:                   | Did you like the movie?                                                                                                                                                                                                                                                                                                                                                                                                                                                                                                                                                                                                                             |
| user1:                   | Yes, his style really extended the story.                                                                                                                                                                                                                                                                                                                                                                                                                                                                                                                                                                                                           |
| user2:                   | I agree. He has a way with fantasy elements that really helped this story be truly beautiful.                                                                                                                                                                                                                                                                                                                                                                                                                                                                                                                                                       |
| user2:                   | It has a very high rating on rotten tomatoes, too. I don't always expect that with movies in this genre.                                                                                                                                                                                                                                                                                                                                                                                                                                                                                                                                            |
| user1:                   | ally Hawkins acting was phenomenally expressive. Didn't feel her character was mentally handicapped.                                                                                                                                                                                                                                                                                                                                                                                                                                                                                                                                                |
| user2:                   | The characterization of her as such was definitely off the mark.                                                                                                                                                                                                                                                                                                                                                                                                                                                                                                                                                                                    |

Table 5: Utterances that corresponds to section 1 of the document in the example conversation 2.

| Section 2      |                                                                                                                                                                                                                                                                                                                                                                                                                                                                                                                                                                                                                                                                                                                                                                                                                         |
|----------------|-------------------------------------------------------------------------------------------------------------------------------------------------------------------------------------------------------------------------------------------------------------------------------------------------------------------------------------------------------------------------------------------------------------------------------------------------------------------------------------------------------------------------------------------------------------------------------------------------------------------------------------------------------------------------------------------------------------------------------------------------------------------------------------------------------------------------|
| <b>Scene 1</b> | Elisa Esposito, who as an orphaned child, was found in a river with wounds on her neck, is mute, and communicates through sign language. She lives alone in an apartment above a cinema, and works as a cleaning-woman at a secret government laboratory in Baltimore at the height of the Cold War. Her friends are her closeted next-door neighbor Giles, a struggling advertising illustrator who shares a strong bond with her, and her co-worker Zelda, a woman who also serves as her interpreter at work. The facility receives a mysterious creature captured from a South American river by Colonel Richard Strickland, who is in charge of the project to study it. Curious about the creature, Elisa discovers it is a humanoid amphibian. She begins visiting him in secret, and the two form a close bond. |
| Conversation   |                                                                                                                                                                                                                                                                                                                                                                                                                                                                                                                                                                                                                                                                                                                                                                                                                         |
| user1:         | Might as well label Giles too.                                                                                                                                                                                                                                                                                                                                                                                                                                                                                                                                                                                                                                                                                                                                                                                          |
| user2:         | haha. because he is closeted?                                                                                                                                                                                                                                                                                                                                                                                                                                                                                                                                                                                                                                                                                                                                                                                           |
| user2:         | Whoever made that comment was certainly not well informed and not politically correct by any stretch.                                                                                                                                                                                                                                                                                                                                                                                                                                                                                                                                                                                                                                                                                                                   |
| user1:         | I think Octavia Spencer should look for more roles set in the early 60s.                                                                                                                                                                                                                                                                                                                                                                                                                                                                                                                                                                                                                                                                                                                                                |
| user2:         | Do you think that the creature they find in the movie is supposed to be somehow connected to the cold war?                                                                                                                                                                                                                                                                                                                                                                                                                                                                                                                                                                                                                                                                                                              |

Table 6: Utterances that corresponds to section 2 of the document in the example conversation 2.

| Section 3      |                                                                                                                                                                                                                                                                                                                                                                                                                                                                                                                                                                                                                                                                                                                                                                                                                                                                                                                                                                                                |
|----------------|------------------------------------------------------------------------------------------------------------------------------------------------------------------------------------------------------------------------------------------------------------------------------------------------------------------------------------------------------------------------------------------------------------------------------------------------------------------------------------------------------------------------------------------------------------------------------------------------------------------------------------------------------------------------------------------------------------------------------------------------------------------------------------------------------------------------------------------------------------------------------------------------------------------------------------------------------------------------------------------------|
| <b>Scene 2</b> | Elisa keeps the creature in her bathtub, adding salt to the water to keep him alive. She plans to release the creature into a nearby canal when it will be opened to the ocean in several days' time. As part of his efforts to recover the creature, Strickland interrogates Elisa and Zelda, but the failure of his advances toward Elisa hampers his judgment, and he dismisses them. Back at the apartment, Giles discovers the creature devouring one of his cats, Pandora. Startled, the creature slashes Giles's arm and rushes out of the apartment. The creature gets as far as the cinema downstairs before Elisa finds him and returns him to her apartment. The creature touches Giles on his balding head and his wounded arm; the next morning, Giles discovers his hair has begun growing back and the wounds on his arm have healed. Elisa and the creature soon become romantically involved, having sex in her bathroom, which she at one point fills completely with water. |
| Conversation   |                                                                                                                                                                                                                                                                                                                                                                                                                                                                                                                                                                                                                                                                                                                                                                                                                                                                                                                                                                                                |
| user1:         | Actually Del Toro does an incredible job showing working people.                                                                                                                                                                                                                                                                                                                                                                                                                                                                                                                                                                                                                                                                                                                                                                                                                                                                                                                               |
| user2:         | That's an excellent point.                                                                                                                                                                                                                                                                                                                                                                                                                                                                                                                                                                                                                                                                                                                                                                                                                                                                                                                                                                     |
| user1:         | Yes, the Cold War invented the Russians, I kind of thought it also represented technology in general.                                                                                                                                                                                                                                                                                                                                                                                                                                                                                                                                                                                                                                                                                                                                                                                                                                                                                          |
| user2:         | That makes perfect sense.                                                                                                                                                                                                                                                                                                                                                                                                                                                                                                                                                                                                                                                                                                                                                                                                                                                                                                                                                                      |
| user2:         | I really like that Eliza chose to keep the creature in her bathtub.                                                                                                                                                                                                                                                                                                                                                                                                                                                                                                                                                                                                                                                                                                                                                                                                                                                                                                                            |
| user1:         | It was interesting that neither power treated the monster well.                                                                                                                                                                                                                                                                                                                                                                                                                                                                                                                                                                                                                                                                                                                                                                                                                                                                                                                                |
| user1:         | Yes the magical realism was truly magical ... easy to suspend disbelief.                                                                                                                                                                                                                                                                                                                                                                                                                                                                                                                                                                                                                                                                                                                                                                                                                                                                                                                       |

Table 7: Utterances that corresponds to section 3 of the document in the example conversation 2.

| Section 4      |                                                                                                                                                                                                                                                                                                                                                                                                                                                                                                                                                                                                                                                                                                                                                                                                                                                                                                                                                                                                                                                                                                                                                                                                                                                                                                                                                                                                                                                              |
|----------------|--------------------------------------------------------------------------------------------------------------------------------------------------------------------------------------------------------------------------------------------------------------------------------------------------------------------------------------------------------------------------------------------------------------------------------------------------------------------------------------------------------------------------------------------------------------------------------------------------------------------------------------------------------------------------------------------------------------------------------------------------------------------------------------------------------------------------------------------------------------------------------------------------------------------------------------------------------------------------------------------------------------------------------------------------------------------------------------------------------------------------------------------------------------------------------------------------------------------------------------------------------------------------------------------------------------------------------------------------------------------------------------------------------------------------------------------------------------|
| <b>Scene 3</b> | Hoyt gives Strickland an ultimatum, asking him to recover the creature within 36 hours. Meanwhile, Mosenkov is told by his handlers that he will be extracted in two days. As the planned release date approaches, the creature's health starts deteriorating. Mosenkov leaves to rendezvous with his handlers, with Strickland tailing him. At the rendezvous, Mosenkov is shot by one of his handlers, but Strickland shoots the handlers dead and then tortures Mosenkov for information. Mosenkov implicates Elisa and Zelda before dying from his wounds. Strickland then threatens Zelda in her home, causing her terrified husband to reveal that Elisa had been keeping the creature. Strickland searches Elisa's apartment and finds a calendar note revealing when and where she plans to release him. At the canal, Elisa and Giles bid farewell to the creature, but Strickland arrives and attacks them all. Strickland knocks Giles down and shoots the creature and Elisa, who both appear to die. However, the creature heals himself and slashes Strickland's throat, killing him. As police arrive on the scene with Zelda, the creature takes Elisa and jumps into the canal, where, deep under water, he heals her. When he applies his healing touch to the scars on her neck, she starts to breathe through gills. In a closing voiceover narration, Giles conveys his belief that Elisa lived 'happily ever after' with the creature. |
| Conversation   |                                                                                                                                                                                                                                                                                                                                                                                                                                                                                                                                                                                                                                                                                                                                                                                                                                                                                                                                                                                                                                                                                                                                                                                                                                                                                                                                                                                                                                                              |
| user2:         | Yes. I think it was beautiful that the creature essentially had healing power.                                                                                                                                                                                                                                                                                                                                                                                                                                                                                                                                                                                                                                                                                                                                                                                                                                                                                                                                                                                                                                                                                                                                                                                                                                                                                                                                                                               |
| user1:         | Del Toro does well with violence.                                                                                                                                                                                                                                                                                                                                                                                                                                                                                                                                                                                                                                                                                                                                                                                                                                                                                                                                                                                                                                                                                                                                                                                                                                                                                                                                                                                                                            |
| user1:         | The ending was suspenseful, without being over the top.                                                                                                                                                                                                                                                                                                                                                                                                                                                                                                                                                                                                                                                                                                                                                                                                                                                                                                                                                                                                                                                                                                                                                                                                                                                                                                                                                                                                      |
| user2:         | What a powerful ending. Even though it was obviously a pure fantasy scenario, there was so much real emotion.                                                                                                                                                                                                                                                                                                                                                                                                                                                                                                                                                                                                                                                                                                                                                                                                                                                                                                                                                                                                                                                                                                                                                                                                                                                                                                                                                |
| user2:         | He does do well with violence. I've noticed that in all of his movies.                                                                                                                                                                                                                                                                                                                                                                                                                                                                                                                                                                                                                                                                                                                                                                                                                                                                                                                                                                                                                                                                                                                                                                                                                                                                                                                                                                                       |
| user2:         | Del Toro is one of my favorite directors.                                                                                                                                                                                                                                                                                                                                                                                                                                                                                                                                                                                                                                                                                                                                                                                                                                                                                                                                                                                                                                                                                                                                                                                                                                                                                                                                                                                                                    |
| user1:         | Yes, happy endings usually feel fake. This one felt great.                                                                                                                                                                                                                                                                                                                                                                                                                                                                                                                                                                                                                                                                                                                                                                                                                                                                                                                                                                                                                                                                                                                                                                                                                                                                                                                                                                                                   |
| user2:         | Totally. It felt like what should have happened, rather than just a sappy pretend ending that was forced on the viewer.                                                                                                                                                                                                                                                                                                                                                                                                                                                                                                                                                                                                                                                                                                                                                                                                                                                                                                                                                                                                                                                                                                                                                                                                                                                                                                                                      |
| user1:         | Mine too. Evidently Hollywood is starting to agree.                                                                                                                                                                                                                                                                                                                                                                                                                                                                                                                                                                                                                                                                                                                                                                                                                                                                                                                                                                                                                                                                                                                                                                                                                                                                                                                                                                                                          |
| user2:         | It took a while, but yes, finally.                                                                                                                                                                                                                                                                                                                                                                                                                                                                                                                                                                                                                                                                                                                                                                                                                                                                                                                                                                                                                                                                                                                                                                                                                                                                                                                                                                                                                           |
| user1:         | It really appeared to be filmed in Baltimore. Installation looked so authentic.                                                                                                                                                                                                                                                                                                                                                                                                                                                                                                                                                                                                                                                                                                                                                                                                                                                                                                                                                                                                                                                                                                                                                                                                                                                                                                                                                                              |
| user2:         | Do you know where it was actually filmed?                                                                                                                                                                                                                                                                                                                                                                                                                                                                                                                                                                                                                                                                                                                                                                                                                                                                                                                                                                                                                                                                                                                                                                                                                                                                                                                                                                                                                    |
| user1:         | No. Can you imagine soaking in that pool?                                                                                                                                                                                                                                                                                                                                                                                                                                                                                                                                                                                                                                                                                                                                                                                                                                                                                                                                                                                                                                                                                                                                                                                                                                                                                                                                                                                                                    |
| user2:         | :)                                                                                                                                                                                                                                                                                                                                                                                                                                                                                                                                                                                                                                                                                                                                                                                                                                                                                                                                                                                                                                                                                                                                                                                                                                                                                                                                                                                                                                                           |
| user1:         | Would make a great tourist draw.                                                                                                                                                                                                                                                                                                                                                                                                                                                                                                                                                                                                                                                                                                                                                                                                                                                                                                                                                                                                                                                                                                                                                                                                                                                                                                                                                                                                                             |
| user2:         | That would be amazing! What a great idea!                                                                                                                                                                                                                                                                                                                                                                                                                                                                                                                                                                                                                                                                                                                                                                                                                                                                                                                                                                                                                                                                                                                                                                                                                                                                                                                                                                                                                    |
| user2:         | Haven't we completed the amount of discussion needed yet?                                                                                                                                                                                                                                                                                                                                                                                                                                                                                                                                                                                                                                                                                                                                                                                                                                                                                                                                                                                                                                                                                                                                                                                                                                                                                                                                                                                                    |
| user1:         | Place looked like a cross between a nuclear power plant and an aquarium.<br>I think we hit all the points mentioned.                                                                                                                                                                                                                                                                                                                                                                                                                                                                                                                                                                                                                                                                                                                                                                                                                                                                                                                                                                                                                                                                                                                                                                                                                                                                                                                                         |

Table 8: Utterances that corresponds to section 4 of the document in the example conversation 2.
